# Supplementary material
Source: publisher figshare collection journal article supplement (https://gsapubs.figshare.com/ndownloader/files/25883727)
Supplement: Supplementary file 1 [file 25883727]

## Sheet: Data
	Dataset S1. Campanain Temperature database
	Sample #	Source	Type	Type Val	Proxy	Age	Sub-Age	Quant. Age	Q. Age Error	Rounded Age	Camp PaleoLat	Camp PaleoLon	Lat	Lon	Temperature	Adj. Temp.	Uncertainty	n	Uncertainty Type	Final Uncertainty	Season	Seasonval	Notes
	NA_KT_anm_56	Amiot et al., 2004 (calculated from)	Animal d18O	1	Turtle d18O	Campanian	Late	76.2	0.02	75	58.1839	-77.1477	49.1583	-110.5	14.449	15.4307	1.95318	8	95% CI	2.81858	MAT	2	Alberta, Onefour; ages and locality from Eberth and Hamblin, 1993; Oldman and Dinosaur Park Formations; "n" is assumed for uncertainties
	NA_KT_anm_63	Amiot et al., 2004 (calculated from)	Animal d18O	1	Crocodile d18O	Campanian	Middle, Late	76.565	0.465	75	59.8516	-77.3417	50.7	-111.5	12.6122	13.2399	1.8403	8	95% CI	2.65569	MAT	2	Calculated from Fowler, 2017 ages for the Dinosaur Park Formation (see Table S1)
	NA_KT_anm_64	Amiot et al., 2004 (calculated from)	Animal d18O	1	Crocodile d18O	Campanian	Middle, Late	76.565	0.465	75	59.8516	-77.3417	50.7	-111.5	12	12.6276	1.80268	8	95% CI	2.6014	MAT	2	Calculated from Fowler, 2017 ages for the Dinosaur Park Formation (see Table S1)
	NA_KT_anm_65	Amiot et al., 2004 (calculated from)	Animal d18O	1	Crocodile d18O	Campanian	Middle, Late	76.565	0.465	75	59.8516	-77.3417	50.7	-111.5	14.0408	14.6684	1.92809	8	95% CI	2.78238	MAT	2	Calculated from Fowler, 2017 ages for the Dinosaur Park Formation (see Table S1)
	NA_KT_anm_66	Amiot et al., 2004 (calculated from)	Animal d18O	1	Crocodile d18O	Campanian	Middle, Late	76.565	0.465	75	59.8516	-77.3417	50.7	-111.5	14.2449	14.8725	1.94064	8	95% CI	2.80048	MAT	2	Calculated from Fowler, 2017 ages for the Dinosaur Park Formation (see Table S1)
	NA_KT_anm_67	Amiot et al., 2004 (calculated from)	Animal d18O	1	Turtle d18O	Campanian	Middle, Late	76.565	0.465	75	59.8516	-77.3417	50.7	-111.5	10.1633	10.7909	1.6898	8	95% CI	2.43851	MAT	2	Calculated from Fowler, 2017 ages for the Dinosaur Park Formation (see Table S1)
	NA_KT_anm_87	Amiot et al., 2004 (calculated from)	Animal d18O	1	Crocodile d18O	Campanian	Middle, Late	77.365	2.155	75	56.5902	-77.0416	47.6667	-109.65	14.2449	14.8725	1.94064	8	95% CI	2.80048	MAT	2	Calculated from Fowler, 2017 age for the Judith River Formation (see Table S1)
	NA_KT_anm_88	Amiot et al., 2004 (calculated from)	Animal d18O	1	Crocodile d18O	Campanian	Middle, Late	77.365	2.155	75	56.5902	-77.0416	47.6667	-109.65	17.3061	17.9337	2.12876	8	95% CI	3.07196	MAT	2	Calculated from Fowler, 2017 age for the Judith River Formation (see Table S1)
	NA_KT_anm_89	Amiot et al., 2004 (calculated from)	Animal d18O	1	Crocodile d18O	Campanian	Middle, Late	77.365	2.155	75	56.5902	-77.0416	47.6667	-109.65	15.6735	16.3011	2.02843	8	95% CI	2.92717	MAT	2	Calculated from Fowler, 2017 age for the Judith River Formation (see Table S1)
	NA_KT_anm_90	Amiot et al., 2004 (calculated from)	Animal d18O	1	Crocodile d18O	Campanian	Middle, Late	77.365	2.155	75	56.5902	-77.0416	47.6667	-109.65	13.0204	13.648	1.86538	8	95% CI	2.69189	MAT	2	Calculated from Fowler, 2017 age for the Judith River Formation (see Table S1)
	NA_KT_anm_91	Amiot et al., 2004 (calculated from)	Animal d18O	1	Crocodile d18O	Campanian	Middle, Late	77.365	2.155	75	56.5902	-77.0416	47.6667	-109.65	14.2449	14.8725	1.94064	8	95% CI	2.80048	MAT	2	Calculated from Fowler, 2017 age for the Judith River Formation (see Table S1)
	NA_KT_anm_92	Amiot et al., 2004 (calculated from)	Animal d18O	1	Crocodile d18O	Campanian	Middle, Late	77.365	2.155	75	56.5902	-77.0416	47.6667	-109.65	14.8571	15.4847	1.97826	8	95% CI	2.85478	MAT	2	Calculated from Fowler, 2017 age for the Judith River Formation (see Table S1)
	NA_KT_anm_93	Amiot et al., 2004 (calculated from)	Animal d18O	1	Crocodile d18O	Campanian	Middle, Late	77.365	2.155	75	56.5902	-77.0416	47.6667	-109.65	14.6531	15.2807	1.96572	8	95% CI	2.83668	MAT	2	Calculated from Fowler, 2017 age for the Judith River Formation (see Table S1)
	NA_KT_anm_94	Amiot et al., 2004 (calculated from)	Animal d18O	1	Crocodile d18O	Campanian	Middle, Late	77.365	2.155	75	56.5902	-77.0416	47.6667	-109.65	11.5918	12.2194	1.77759	8	95% CI	2.5652	MAT	2	Calculated from Fowler, 2017 age for the Judith River Formation (see Table S1)
	NA_KT_anm_95	Amiot et al., 2004 (calculated from)	Animal d18O	1	Crocodile d18O	Campanian	Middle, Late	77.365	2.155	75	56.5902	-77.0416	47.6667	-109.65	13.0204	13.648	1.86538	8	95% CI	2.69189	MAT	2	Calculated from Fowler, 2017 age for the Judith River Formation (see Table S1)
	NA_KT_anm_96	Amiot et al., 2004 (calculated from)	Animal d18O	1	Dinosaur d18O	Campanian	Late	74.75	2.15	75	37.5229	-77.4837	29.25	-103.25	18.9388	20.1592	2.2291	8	95% CI	3.21675	MAT	2	Sample from Aguja Formation (Kolodny et al., 1996), Upper Shale Aguja ages from Longrich et al., 2010, Breyer et al., 2007; Befus et al., 2008
	NA_KT_anm_97	Amiot et al., 2004 (calculated from)	Animal d18O	1	Dinosaur d18O	Campanian	Late	74.75	2.15	75	37.5229	-77.4837	29.25	-103.25	21.5918	22.8123	2.39214	8	95% CI	3.45204	MAT	2	Sample from Aguja Formation (Kolodny et al., 1996), Upper Shale Aguja ages from Longrich et al., 2010, Breyer et al., 2007; Befus et al., 2008
	NA_KT_anm_98	Amiot et al., 2004 (calculated from)	Animal d18O	1	Dinosaur d18O	Campanian	Late	74.75	2.15	75	37.5229	-77.4837	29.25	-103.25	19.9592	21.1796	2.29181	8	95% CI	3.30725	MAT	2	Sample from Aguja Formation (Kolodny et al., 1996), Upper Shale Aguja ages from Longrich et al., 2010, Breyer et al., 2007; Befus et al., 2008
	NA_KT_anm_99	Amiot et al., 2004 (calculated from)	Animal d18O	1	Crocodile d18O	Campanian	Late	74.75	2.15	75	37.5229	-77.4837	29.25	-103.25	18.5306	19.7511	2.20401	8	95% CI	3.18056	MAT	2	Sample from Aguja Formation (Kolodny et al., 1996), Upper Shale Aguja ages from Longrich et al., 2010, Breyer et al., 2007; Befus et al., 2008
	NA_KT_anm_100	Amiot et al., 2004 (calculated from)	Animal d18O	1	Crocodile d18O	Campanian	Late	74.75	2.15	75	37.5229	-77.4837	29.25	-103.25	19.1429	20.3633	2.24164	8	95% CI	3.23485	MAT	2	Sample from Aguja Formation (Kolodny et al., 1996), Upper Shale Aguja ages from Longrich et al., 2010, Breyer et al., 2007; Befus et al., 2008
	NA_KT_anm_101	Amiot et al., 2004 (calculated from)	Animal d18O	1	Crocodile d18O	Campanian	Late	74.75	2.15	75	37.5229	-77.4837	29.25	-103.25	18.3265	19.547	2.19147	8	95% CI	3.16246	MAT	2	Sample from Aguja Formation (Kolodny et al., 1996), Upper Shale Aguja ages from Longrich et al., 2010, Breyer et al., 2007; Befus et al., 2008
	NA_KT_anm_102	Amiot et al., 2004 (calculated from)	Animal d18O	1	Crocodile d18O	Campanian	Late	74.75	2.15	75	37.5229	-77.4837	29.25	-103.25	18.3265	19.547	2.19147	8	95% CI	3.16246	MAT	2	Sample from Aguja Formation (Kolodny et al., 1996), Upper Shale Aguja ages from Longrich et al., 2010, Breyer et al., 2007; Befus et al., 2008
	NA_KT_anm_103	Amiot et al., 2004 (calculated from)	Animal d18O	1	Crocodile d18O	Campanian	Late	74.75	2.15	75	37.5229	-77.4837	29.25	-103.25	20.3673	21.5878	2.31689	8	95% CI	3.34345	MAT	2	Sample from Aguja Formation (Kolodny et al., 1996), Upper Shale Aguja ages from Longrich et al., 2010, Breyer et al., 2007; Befus et al., 2008
	NA_KT_anm_104	Amiot et al., 2004 (calculated from)	Animal d18O	1	Dinosaur d18O	Campanian	Late	74.75	2.15	75	37.5229	-77.4837	29.25	-103.25	19.551	20.7715	2.26672	8	95% CI	3.27105	MAT	2	Sample from Aguja Formation (Kolodny et al., 1996), Upper Shale Aguja ages from Longrich et al., 2010, Breyer et al., 2007; Befus et al., 2008
	NA_KT_anm_105	Amiot et al., 2004 (calculated from)	Animal d18O	1	Dinosaur d18O	Campanian	Late	74.75	2.15	75	37.5229	-77.4837	29.25	-103.25	19.3469	20.5674	2.25418	8	95% CI	3.25295	MAT	2	Sample from Aguja Formation (Kolodny et al., 1996), Upper Shale Aguja ages from Longrich et al., 2010, Breyer et al., 2007; Befus et al., 2008
	NA_KT_anm_106	Amiot et al., 2004 (calculated from)	Animal d18O	1	Turtle d18O	Campanian	Late	74.75	2.15	75	37.5229	-77.4837	29.25	-103.25	21.7959	23.0164	2.40468	8	95% CI	3.47014	MAT	2	Sample from Aguja Formation (Kolodny et al., 1996), Upper Shale Aguja ages from Longrich et al., 2010, Breyer et al., 2007; Befus et al., 2008
	NA_KT_anm_107	Barrick et al., 1999	Animal d18O	1	Turtle/gar d18O	Campanian	Middle	76.35	0.55	75	59.8516	-77.3417	50.7	-111.5	14.2	15.1818	1	NULL	std. dev.	1	MAT	2	Calculated from Fowler, 2017 ages for the Dinosaur Park Formation (see Table S1)
	NA_KT_anm_108	Barrick et al., 1999	Animal d18O	1	Turtle/gar d18O	Campanian	Middle	76.35	0.55	75	59.8516	-77.3417	50.7	-111.5	18.9	19.8818	1	NULL	std. dev.	1	MAT	2	Calculated from Fowler, 2017 ages for the Dinosaur Park Formation (see Table S1)
	NA_KT_lma_13	Upchurch et al., 2015	Leaf Margin Analysis	3	LMA	Campanian	Late	74.2	2.1	75	42.3341	-80.3386	33.3826	-107.108	22	23.3437	2.3	NULL	std. dev.	2.3	MAT	2	Double check lat versus paleolat; age estimated from the Fowler, 2017 Table S1
	NA_KT_lma_14	Upchurch et al 2015	Leaf Margin Analysis	3	LMA	Campanian	Late	74.3	1.8	75	42.1759	-80.4994	33.2	-107.2	22	23.3437	2.3	NULL	std. dev.	2.3	MAT	2	McRae Formation, Jose Creek Member; age from Estrada-ruiz et al., (2018), Amato et al. (2017), and Fowler, 2017 Table S1
	NA_KT_lma_15	Recalculation of data from Estrada-Ruiz et al., 2008 (from Upchurch et al., 2015 data repository	Leaf Margin Analysis	3	LMA	Campanian	Late	74.2	2.1	75	35.3447	-75.6245	27.5	-101	25	26.3437	2	NULL	std. dev.	2	MAT	2	base of Olmos Fm., from Upchurch et al., 2015 data repository (paleolongitude available in data repository)
	NA_KT_lma_16	Miller et al., 2013	Leaf Margin Analysis	3	LMA	Campanian	Late	75.705	0.015	75	47.4859	-85.3348	37.6519	-111.865	20.16	21.1418	2.33	NULL	std. error of the mean	2.33	MAT	2	Kaiparowits Fm., Std. Dev. Calculated from equation in Uhl et al. (2003) and coefficient from Miller et al. (2006)
	NA_KT_lma_17	Wolfe and Upchurch, 1987; Foreman et al., 2011	Leaf Margin Analysis	3	LMA	Campanian	Middle	77.2	NULL	75	57.958	-79.642	48.5244	-112.291	16	16.6276	4.8	NULL	std. error of the mean	4.8	MAT	2	Two Medicine/Judith River Fms., Error from Peppe et al., 2011; age estimate from Fowler, 2017 Table S1; SE assumed to be "sampling error" and assumed to be equal to 1 standard deviation
	NA_KT_lma_18	Van Boskirk, 1998 (thesis)	Leaf Margin Analysis	3	LMA	Campanian	Early	81.265	0.265	80	53.8833	-77.5813	44.9961	-108.87	13	11.0565	4.8	NULL	std. error of the mean	4.8	MAT	2	Eagle Fm., error from Peppe et al., 2011; standard deviation assumed due to lack of info; SE assumed to be "sampling error" and assumed to be equal to 1 standard deviation
	NA_KT_lma_19	Van Boskirk, 1998 (thesis)	Leaf Margin Analysis	3	LMA	Campanian	Early	81.265	0.265	80	53.8833	-77.5813	44.9961	-108.87	16.2	14.2565	4.8	NULL	std. error of the mean	4.8	MAT	2	Eagle Fm., error from Peppe et al., 2011; standard deviation assumed due to lack of info; SE assumed to be "sampling error" and assumed to be equal to 1 standard deviation
	NA_KT_lma_39	Prue, 2018 (thesis)	Leaf Margin Analysis	3	LMA	Campanian	Middle	77.1	NULL	75	57.9601	-79.6413	48.5265	-112.291	8	8.62761	4.8	NULL	std. error of the mean	4.8	MAT	2	Two Medicine Formation, Oilfield Coulee fossil locality; error from Peppe et al., 2011; sampling error assumed to be equal to 1 standard deviaiton
	NA_KT_lma_40	Prue, 2018 (thesis)	Leaf Margin Analysis	3	LMA	Campanian	Middle	77.1	NULL	75	57.9601	-79.6413	48.5265	-112.291	12	12.6276	4.8	NULL	std. error of the mean	4.8	MAT	2	Two Medicine Formation, Oilfield Coulee fossil locality; error from Peppe et al., 2011; sampling error assumed to be equal to 1 standard deviaiton
	NA_KT_clp_16	Jack Wolfe, oral Communication (from Upchurch et al., 2015 data repository)	CLAMP	2	CLAMP	Campanian	Late	74.2	2.1	75	35.3447	-75.6245	27.5	-101	24.5	25.8437	2.8	NULL	std. dev.	2.8	MAT	2	Olmos Formation; from Upchurch et al., 2015 data repository (paleolongitude available in data repository); age data from Estrada-Ruiz, 2007
	NA_KT_clp_17	Van Boskirk, 1998 (thesis)	CLAMP	2	CLAMP	Campanian	Early	81	0.5	80	53.8722	-77.499	45	-108.8	13	11.0565	2.8	NULL	std. dev.	2.8	MAT	2	Paleolatitude from Van Boskirk, 1998; age from Van Boskirk, 1998; CLAMP uncertainty from Upchurch et al., 2015
	NA_KT_clp_41	Prue, 2018 (thesis)	CLAMP	2	CLAMP	Campanian	Middle	77.1	NULL	75	57.9601	-79.6413	48.5265	-112.291	11.8533	12.4809	2.8	NULL	std. dev.	2.8	MAT	2	Two Medicine Formation, Oilfield Coulee fossil locality; average of low estimates from Table 9; CLAMP uncertainty from Upchurch et al., 2015
	NA_KT_clp_42	Prue, 2018 (thesis)	CLAMP	2	CLAMP	Campanian	Middle	77.1	NULL	75	57.9601	-79.6413	48.5265	-112.291	15.1911	15.8187	2.8	NULL	std. dev.	2.8	MAT	2	Two Medicine Formation, Oilfield Coulee fossil locality; average of low estimates from Table 9; CLAMP uncertainty from Upchurch et al., 2015
	NA_KT_ped_57	Snell et al., 2014	Paleosols/Paleosol Carbonates	5	Soil Carbonate D47	Campanian	Late	75.15	NULL	75	49.2101	-84.2455	39.48	-111.49	21.5	22.7205	6.8	8	std. error	13.6	MAT	2	North Horn Formation; MAT value estimated by Zhang et al. (2019) in supplementary materials
	NA_KT_otr_3	Nordt et al., 2011	Other	4	Other	Campanian	Late	72.6	1.5	75	37.5229	-77.4837	29.25	-103.25	15	16.3515	4	NULL	std. dev.	4	MAT	2	Aguja Formation; uncertainty estimated
	NA_KT_otr_4	Nordt et al., 2011	Other	4	Other	Campanian	Late	72.6	1.5	75	37.5229	-77.4837	29.25	-103.25	20	21.3515	4	NULL	std. dev.	4	MAT	2	Aguja Formation; uncertainty estimated
	NA_KT_otr_15	Prue, 2018 (thesis)	Other	4	Digital Leaf Physiognomy	Campanian	Middle	77.1	NULL	75	57.9601	-79.6413	48.5265	-112.291	19	19.6276	4	NULL	std. error of the mean	4	MAT	2	Two Medicine Formation, Oilfield Coulee fossil locality; Table 11, Peppe et al. (2011) equation, Royer average; standard deviation from Peppe et al., 2011
	NA_KT_otr_16	Prue, 2018 (thesis)	Other	4	Digital Leaf Physiognomy	Campanian	Middle	77.1	NULL	75	57.9601	-79.6413	48.5265	-112.291	26	26.6276	4	NULL	std. error of the mean	4	MAT	2	Two Medicine Formation, Oilfield Coulee fossil locality; Table 11, Peppe et al. (2011) equation, Huff average; standard deviation from Peppe et al., 2011
	NA_KT_otr_17	Prue, 2018 (thesis)	Other	4	Digital Leaf Physiognomy	Campanian	Middle	77.1	NULL	75	57.9601	-79.6413	48.5265	-112.291	11.6667	12.2943	1.99	NULL	std. error of the mean	1.99	MAT	2	Two Medicine Formation, Oilfield Coulee fossil locality; Table 11, Royer et al. (2005) equation, Royer average; standard deviation from Peppe et al., 2011
	NA_KT_otr_18	Prue, 2018 (thesis)	Other	4	Digital Leaf Physiognomy	Campanian	Middle	77.1	NULL	75	57.9601	-79.6413	48.5265	-112.291	13	13.6276	1.99	NULL	std. error of the mean	1.99	MAT	2	Two Medicine Formation, Oilfield Coulee fossil locality; Table 11, Royer et al. (2005) equation, Huff average; standard deviation from Peppe et al., 2011
	NA_KT_otr_19	Prue, 2018 (thesis)	Other	4	Digital Leaf Physiognomy	Campanian	Middle	77.1	NULL	75	57.9601	-79.6413	48.5265	-112.291	22	22.6276	3.79	NULL	std. error of the mean	3.79	MAT	2	Two Medicine Formation, Oilfield Coulee fossil locality; Table 11, Oliver (2010) equation, Royer average; standard deviation from Peppe et al., 2011
	NA_KT_otr_20	Prue, 2018 (thesis)	Other	4	Digital Leaf Physiognomy	Campanian	Middle	77.1	NULL	75	57.9601	-79.6413	48.5265	-112.291	23.3333	23.9609	3.79	NULL	std. error of the mean	3.79	MAT	2	Two Medicine Formation, Oilfield Coulee fossil locality; Table 11, Oliver (2010) equation, Huff average; standard deviation from Peppe et al., 2011
	NA_KT_clp_18	Van Boskirk, 1998 (thesis)	CLAMP	2	CLAMP	Campanian	Early	81	0.5	80	53.8722	-77.499	45	-108.8	4.8	6	3	NULL	std. error of the mean	3	CMMT	1	Paleolatitude from Van Boskirk, 1998; age from Van Boskirk, 1998; CLAMP uncertainty from Upchurch et al., 2015
	NA_KT_clp_45	Prue, 2018 (thesis)	CLAMP	2	CLAMP	Campanian	Middle	77.1	NULL	75	57.9601	-79.6413	48.5265	-112.291	1.92222	2.54983	3	NULL	std. error of the mean	3	CMMT	1	Two Medicine Formation, Oilfield Coulee fossil locality; average of low estimates from Table 9; CLAMP uncertainty from Upchurch et al., 2015
	NA_KT_clp_46	Prue, 2018 (thesis)	CLAMP	2	CLAMP	Campanian	Middle	77.1	NULL	75	57.9601	-79.6413	48.5265	-112.291	7.49222	8.11983	3	NULL	std. error of the mean	3	CMMT	1	Two Medicine Formation, Oilfield Coulee fossil locality; average of high estimates from Table 9; CLAMP uncertainty from Upchurch et al., 2015
	NA_KT_ped_53	Burgener et al., 2019	Paleosols/Paleosol Carbonates	5	Soil Carbonate D47	Campanian	Middle	81	0	80	57.9335	-79.9397	48.4521	-112.506	5	3.05654	4	3	std. error	6.9282	CMMT	1	Ages calculated using average deposition rate of Two Medicine formation and Rogers radiometric ages
	NA_KT_ped_54	Burgener et al., 2019	Paleosols/Paleosol Carbonates	5	Soil Carbonate D47	Campanian	Middle	81	0	80	57.9335	-79.9397	48.4521	-112.506	8	6.05654	4	3	std. error	6.9282	CMMT	1	Ages calculated using average deposition rate of Two Medicine formation and Rogers radiometric ages
	NA_KT_ped_55	Burgener et al., 2019	Paleosols/Paleosol Carbonates	5	Soil Carbonate D47	Campanian	Late	75	NULL	75	47.464	-85.3698	37.6253	-111.887	7	8.22046	5	3	std. error	8.66025	CMMT	1	Ages calculated using average depostion rate of Kaiparowits formation and radiometric ages from Roberts
	NA_KT_ped_56	Burgener et al., 2019	Paleosols/Paleosol Carbonates	5	Soil Carbonate D47	Campanian	Late	75	NULL	75	47.464	-85.3698	37.6253	-111.887	10	11.2205	5	3	std. error	8.66025	CMMT	1	Ages calculated using average depostion rate of Kaiparowits formation and radiometric ages from Roberts
	NA_KT_anm_53	Amiot et al., 2004 (calculated from)	Animal d18O	1	Dinosaur d18O	Campanian	Late	76.2	0.02	75	58.1839	-77.1477	49.1583	-110.5	8.53061	9.51237	1.58946	8	95% CI	2.29372	MAT	2	Alberta, Onefour; ages and locality from Eberth and Hamblin, 1993; Oldman and Dinosaur Park Formations
	NA_KT_anm_54	Amiot et al., 2004 (calculated from)	Animal d18O	1	Dinosaur d18O	Campanian	Late	76.2	0.02	75	58.1839	-77.1477	49.1583	-110.5	12.6122	13.594	1.8403	8	95% CI	2.65569	MAT	2	Alberta, Onefour; ages and locality from Eberth and Hamblin, 1993; Oldman and Dinosaur Park Formations
	NA_KT_anm_55	Amiot et al., 2004 (calculated from)	Animal d18O	1	Crocodile d18O	Campanian	Late	76.2	0.02	75	58.1839	-77.1477	49.1583	-110.5	8.73469	9.71645	1.60201	8	95% CI	2.31182	MAT	2	Alberta, Onefour; ages and locality from Eberth and Hamblin, 1993; Oldman and Dinosaur Park Formations
	NA_KT_anm_57	Amiot et al., 2004 (calculated from)	Animal d18O	1	Fish d18O	Campanian	Late	76.2	0.02	75	58.1839	-77.1477	49.1583	-110.5	8.73469	9.71645	1.60201	8	95% CI	2.31182	MAT	2	Alberta, Onefour; ages and locality from Eberth and Hamblin, 1993; Oldman and Dinosaur Park Formations
	NA_KT_anm_58	Amiot et al., 2004 (calculated from)	Animal d18O	1	Dinosaur d18O	Campanian	Middle, Late	76.565	0.465	75	59.8516	-77.3417	50.7	-111.5	7.91837	8.54597	1.55184	8	95% CI	2.23942	MAT	2	Calculated from Fowler, 2017 ages for the Dinosaur Park Formation (see Table S1)
	NA_KT_anm_59	Amiot et al., 2004 (calculated from)	Animal d18O	1	Dinosaur d18O	Campanian	Middle, Late	76.565	0.465	75	59.8516	-77.3417	50.7	-111.5	11.1837	11.8113	1.75251	8	95% CI	2.529	MAT	2	Calculated from Fowler, 2017 ages for the Dinosaur Park Formation (see Table S1)
	NA_KT_anm_60	Amiot et al., 2004 (calculated from)	Animal d18O	1	Dinosaur d18O	Campanian	Middle, Late	76.565	0.465	75	59.8516	-77.3417	50.7	-111.5	9.95918	10.5868	1.67726	8	95% CI	2.42041	MAT	2	Calculated from Fowler, 2017 ages for the Dinosaur Park Formation (see Table S1)
	NA_KT_anm_61	Amiot et al., 2004 (calculated from)	Animal d18O	1	Dinosaur d18O	Campanian	Middle, Late	76.565	0.465	75	59.8516	-77.3417	50.7	-111.5	10.7755	11.4031	1.72742	8	95% CI	2.4928	MAT	2	Calculated from Fowler, 2017 ages for the Dinosaur Park Formation (see Table S1)
	NA_KT_anm_62	Amiot et al., 2004 (calculated from)	Animal d18O	1	Dinosaur d18O	Campanian	Middle, Late	76.565	0.465	75	59.8516	-77.3417	50.7	-111.5	11.5918	12.2194	1.77759	8	95% CI	2.5652	MAT	2	Calculated from Fowler, 2017 ages for the Dinosaur Park Formation (see Table S1)
	NA_KT_anm_68	Amiot et al., 2004 (calculated from)	Animal d18O	1	Turtle d18O	Campanian	Middle, Late	76.565	0.465	75	59.8516	-77.3417	50.7	-111.5	8.93878	9.56638	1.61455	8	95% CI	2.32991	MAT	2	Calculated from Fowler, 2017 ages for the Dinosaur Park Formation (see Table S1)
	NA_KT_anm_69	Amiot et al., 2004 (calculated from)	Animal d18O	1	Turtle d18O	Campanian	Middle, Late	76.565	0.465	75	59.8516	-77.3417	50.7	-111.5	7.91837	8.54597	1.55184	8	95% CI	2.23942	MAT	2	Calculated from Fowler, 2017 ages for the Dinosaur Park Formation (see Table S1)
	NA_KT_anm_70	Amiot et al., 2004 (calculated from)	Animal d18O	1	Turtle d18O	Campanian	Middle, Late	76.565	0.465	75	59.8516	-77.3417	50.7	-111.5	7.71429	8.34189	1.5393	8	95% CI	2.22132	MAT	2	Calculated from Fowler, 2017 ages for the Dinosaur Park Formation (see Table S1)
	NA_KT_anm_71	Amiot et al., 2004 (calculated from)	Animal d18O	1	Turtle d18O	Campanian	Middle, Late	76.565	0.465	75	59.8516	-77.3417	50.7	-111.5	5.87755	6.50516	1.42642	8	95% CI	2.05843	MAT	2	Calculated from Fowler, 2017 ages for the Dinosaur Park Formation (see Table S1)
	NA_KT_anm_72	Amiot et al., 2004 (calculated from)	Animal d18O	1	Fish d18O	Campanian	Middle, Late	76.565	0.465	75	59.8516	-77.3417	50.7	-111.5	8.93878	9.56638	1.61455	8	95% CI	2.32991	MAT	2	Calculated from Fowler, 2017 ages for the Dinosaur Park Formation (see Table S1)
	NA_KT_anm_73	Amiot et al., 2004 (calculated from)	Animal d18O	1	Fish d18O	Campanian	Middle, Late	76.565	0.465	75	59.8516	-77.3417	50.7	-111.5	8.73469	9.3623	1.60201	8	95% CI	2.31182	MAT	2	Calculated from Fowler, 2017 ages for the Dinosaur Park Formation (see Table S1)
	NA_KT_anm_74	Amiot et al., 2004 (calculated from)	Animal d18O	1	Fish d18O	Campanian	Middle, Late	76.565	0.465	75	59.8516	-77.3417	50.7	-111.5	8.53061	9.15822	1.58946	8	95% CI	2.29372	MAT	2	Calculated from Fowler, 2017 ages for the Dinosaur Park Formation (see Table S1)
	NA_KT_anm_75	Amiot et al., 2004 (calculated from)	Animal d18O	1	Fish d18O	Campanian	Middle, Late	76.565	0.465	75	59.8516	-77.3417	50.7	-111.5	7.5102	8.13781	1.52676	8	95% CI	2.20322	MAT	2	Calculated from Fowler, 2017 ages for the Dinosaur Park Formation (see Table S1)
	NA_KT_anm_76	Amiot et al., 2004 (calculated from)	Animal d18O	1	Fish d18O	Campanian	Middle, Late	76.565	0.465	75	59.8516	-77.3417	50.7	-111.5	7.71429	8.34189	1.5393	8	95% CI	2.22132	MAT	2	Calculated from Fowler, 2017 ages for the Dinosaur Park Formation (see Table S1)
	NA_KT_anm_77	Amiot et al., 2004 (calculated from)	Animal d18O	1	Fish d18O	Campanian	Middle, Late	76.565	0.465	75	59.8516	-77.3417	50.7	-111.5	6.89796	7.52556	1.48913	8	95% CI	2.14893	MAT	2	Calculated from Fowler, 2017 ages for the Dinosaur Park Formation (see Table S1)
	NA_KT_anm_78	Amiot et al., 2004 (calculated from)	Animal d18O	1	Fish d18O	Campanian	Middle, Late	76.565	0.465	75	59.8516	-77.3417	50.7	-111.5	6.4898	7.1174	1.46405	8	95% CI	2.11273	MAT	2	Calculated from Fowler, 2017 ages for the Dinosaur Park Formation (see Table S1)
	NA_KT_anm_79	Amiot et al., 2004 (calculated from)	Animal d18O	1	Dinosaur d18O	Campanian	Middle, Late	77.365	2.155	75	56.5902	-77.0416	47.6667	-109.65	10.5714	11.199	1.71488	8	95% CI	2.4747	MAT	2	Calculated from Fowler, 2017 age for the Judith River Formation (see Table S1)
	NA_KT_anm_80	Amiot et al., 2004 (calculated from)	Animal d18O	1	Dinosaur d18O	Campanian	Middle, Late	77.365	2.155	75	56.5902	-77.0416	47.6667	-109.65	9.7551	10.3827	1.66472	8	95% CI	2.40231	MAT	2	Calculated from Fowler, 2017 age for the Judith River Formation (see Table S1)
	NA_KT_anm_81	Amiot et al., 2004 (calculated from)	Animal d18O	1	Dinosaur d18O	Campanian	Middle, Late	77.365	2.155	75	56.5902	-77.0416	47.6667	-109.65	11.7959	12.4235	1.79013	8	95% CI	2.5833	MAT	2	Calculated from Fowler, 2017 age for the Judith River Formation (see Table S1)
	NA_KT_anm_82	Amiot et al., 2004 (calculated from)	Animal d18O	1	Dinosaur d18O	Campanian	Middle, Late	77.365	2.155	75	56.5902	-77.0416	47.6667	-109.65	10.9796	11.6072	1.73997	8	95% CI	2.5109	MAT	2	Calculated from Fowler, 2017 age for the Judith River Formation (see Table S1)
	NA_KT_anm_83	Amiot et al., 2004 (calculated from)	Animal d18O	1	Dinosaur d18O	Campanian	Middle, Late	77.365	2.155	75	56.5902	-77.0416	47.6667	-109.65	14.449	15.0766	1.95318	8	95% CI	2.81858	MAT	2	Calculated from Fowler, 2017 age for the Judith River Formation (see Table S1)
	NA_KT_anm_84	Amiot et al., 2004 (calculated from)	Animal d18O	1	Dinosaur d18O	Campanian	Middle, Late	77.365	2.155	75	56.5902	-77.0416	47.6667	-109.65	8.32653	8.95414	1.57692	8	95% CI	2.27562	MAT	2	Calculated from Fowler, 2017 age for the Judith River Formation (see Table S1)
	NA_KT_anm_85	Amiot et al., 2004 (calculated from)	Animal d18O	1	Dinosaur d18O	Campanian	Middle, Late	77.365	2.155	75	56.5902	-77.0416	47.6667	-109.65	15.6735	16.3011	2.02843	8	95% CI	2.92717	MAT	2	Calculated from Fowler, 2017 age for the Judith River Formation (see Table S1)
	NA_KT_anm_86	Amiot et al., 2004 (calculated from)	Animal d18O	1	Dinosaur d18O	Campanian	Middle, Late	77.365	2.155	75	56.5902	-77.0416	47.6667	-109.65	13.0204	13.648	1.86538	8	95% CI	2.69189	MAT	2	Calculated from Fowler, 2017 age for the Judith River Formation (see Table S1)
	NA_KT_clp_19	Van Boskirk, 1998 (thesis)	CLAMP	2	CLAMP	Campanian	Early	81	0.5	80	53.8722	-77.499	45	-108.8	21.2	19.2565	3	NULL	std. error of the mean	3	Summer	3	Paleolatitude from Van Boskirk, 1998; age from Van Boskirk, 1998; summer temp estimated from MAT and CMMT reported in Van Boskirk, 1998 and assumes a symmetrical distribution of seasonal temperatures; CLAMP uncertainty from Upchurch et al., 2015
	NA_KT_clp_43	Prue, 2018 (thesis)	CLAMP	2	CLAMP	Campanian	Middle	77.1	NULL	75	57.9601	-79.6413	48.5265	-112.291	20.49	21.1176	3	NULL	std. error of the mean	3	Summer	3	Two Medicine Formation, Oilfield Coulee fossil locality; average of low estimates from Table 9; CLAMP uncertainty from Upchurch et al., 2015
	NA_KT_clp_44	Prue, 2018 (thesis)	CLAMP	2	CLAMP	Campanian	Middle	77.1	NULL	75	57.9601	-79.6413	48.5265	-112.291	23.2	23.8276	3	NULL	std. error of the mean	3	Summer	3	Two Medicine Formation, Oilfield Coulee fossil locality; average of high estimates from Table 9; CLAMP uncertainty from Upchurch et al., 2015
	NA_KT_ped_37	Burgener et al., 2019	Paleosols/Paleosol Carbonates	5	Soil Carbonate D47	Campanian	Middle	77.1	NULL	75	57.9335	-79.9397	48.4521	-112.506	31.4975	32.1251	3.16819	3	std. error	5.48746	Summer	3	Ages calculated using average deposition rate of Two Medicine formation and Rogers radiometric ages
	NA_KT_ped_38	Burgener et al., 2019	Paleosols/Paleosol Carbonates	5	Soil Carbonate D47	Campanian	Middle	76.9	NULL	75	57.9335	-79.9397	48.4521	-112.506	38.1608	38.7884	6.04897	4	std. error	12.0979	Summer	3	Ages calculated using average deposition rate of Two Medicine formation and Rogers radiometric ages
	NA_KT_ped_39	Burgener et al., 2019	Paleosols/Paleosol Carbonates	5	Soil Carbonate D47	Campanian	Middle	76.9	NULL	75	57.9335	-79.9397	48.4521	-112.506	36.0147	36.6423	6.6981	3	std. error	11.6014	Summer	3	Ages calculated using average deposition rate of Two Medicine formation and Rogers radiometric ages
	NA_KT_ped_40	Burgener et al., 2019	Paleosols/Paleosol Carbonates	5	Soil Carbonate D47	Campanian	Middle	76.9	NULL	75	57.9335	-79.9397	48.4521	-112.506	35.0732	35.7009	3.34801	3	std. error	5.79893	Summer	3	Ages calculated using average deposition rate of Two Medicine formation and Rogers radiometric ages
	NA_KT_ped_41	Burgener et al., 2019	Paleosols/Paleosol Carbonates	5	Soil Carbonate D47	Campanian	Middle	76.8	NULL	75	57.9335	-79.9397	48.4521	-112.506	28.0858	28.7135	3.07304	3	std. error	5.32266	Summer	3	Ages calculated using average deposition rate of Two Medicine formation and Rogers radiometric ages
	NA_KT_ped_42	Burgener et al., 2019	Paleosols/Paleosol Carbonates	5	Soil Carbonate D47	Campanian	Middle	76.6	NULL	75	57.9335	-79.9397	48.4521	-112.506	30.8789	31.5065	3.12729	4	std. error	6.25457	Summer	3	Ages calculated using average deposition rate of Two Medicine formation and Rogers radiometric ages
	NA_KT_ped_43	Burgener et al., 2019	Paleosols/Paleosol Carbonates	5	Soil Carbonate D47	Campanian	Middle	76.5	NULL	75	57.9335	-79.9397	48.4521	-112.506	32.4434	33.071	2.80624	4	std. error	5.61249	Summer	3	Ages calculated using average deposition rate of Two Medicine formation and Rogers radiometric ages
	NA_KT_ped_44	Burgener et al., 2019	Paleosols/Paleosol Carbonates	5	Soil Carbonate D47	Campanian	Middle	76.5	NULL	75	57.9335	-79.9397	48.4521	-112.506	33.7381	34.3658	5.10441	3	std. error	8.84109	Summer	3	Ages calculated using average deposition rate of Two Medicine formation and Rogers radiometric ages
	NA_KT_ped_45	Burgener et al., 2019	Paleosols/Paleosol Carbonates	5	Soil Carbonate D47	Campanian	Middle	76.4	NULL	75	57.9335	-79.9397	48.4521	-112.506	36.1431	37.1249	4.01538	2	std. error	5.67861	Summer	3	Ages calculated using average deposition rate of Two Medicine formation and Rogers radiometric ages
	NA_KT_ped_46	Burgener et al., 2019	Paleosols/Paleosol Carbonates	5	Soil Carbonate D47	Campanian	Middle	76.4	NULL	75	57.9335	-79.9397	48.4521	-112.506	27.338	28.3198	3.71091	2	std. error	5.24802	Summer	3	Ages calculated using average deposition rate of Two Medicine formation and Rogers radiometric ages
	NA_KT_ped_47	Burgener et al., 2019	Paleosols/Paleosol Carbonates	5	Soil Carbonate D47	Campanian	Middle	76.4	NULL	75	57.9335	-79.9397	48.4521	-112.506	37.2363	38.2181	3.38513	4	std. error	6.77026	Summer	3	Ages calculated using average deposition rate of Two Medicine formation and Rogers radiometric ages
	NA_KT_ped_48	Burgener et al., 2019	Paleosols/Paleosol Carbonates	5	Soil Carbonate D47	Campanian	Late	76.2	NULL	75	57.9335	-79.9397	48.4521	-112.506	24.3849	25.3666	3.77555	5	std. error	8.44238	Summer	3	Ages calculated using average deposition rate of Two Medicine formation and Rogers radiometric ages
	NA_KT_ped_49	Burgener et al., 2019	Paleosols/Paleosol Carbonates	5	Soil Carbonate D47	Campanian	Late	75	NULL	75	47.464	-85.3698	37.6253	-111.887	35.3161	36.5366	3.96998	2	std. error	5.6144	Summer	3	Ages calculated using average depostion rate of Kaiparowits formation and radiometric ages from Roberts
	NA_KT_ped_50	Burgener et al., 2019	Paleosols/Paleosol Carbonates	5	Soil Carbonate D47	Campanian	Late	75	NULL	75	47.464	-85.3698	37.6253	-111.887	31.474	32.6945	3.82354	5	std. error	8.5497	Summer	3	Ages calculated using average depostion rate of Kaiparowits formation and radiometric ages from Roberts
	NA_KT_ped_51	Burgener et al., 2019	Paleosols/Paleosol Carbonates	5	Soil Carbonate D47	Campanian	Late	75	NULL	75	47.464	-85.3698	37.6253	-111.887	34.982	36.2025	3.96034	2	std. error	5.60077	Summer	3	Ages calculated using average depostion rate of Kaiparowits formation and radiometric ages from Roberts
	NA_KT_ped_52	Burgener et al., 2019	Paleosols/Paleosol Carbonates	5	Soil Carbonate D47	Campanian	Late	75	NULL	75	47.464	-85.3698	37.6253	-111.887	36.4596	37.68	3.35477	4	std. error	6.70954	Summer	3	Ages calculated using average depostion rate of Kaiparowits formation and radiometric ages from Roberts
	NA_KT_ped_58	Snell et al., 2014	Paleosols/Paleosol Carbonates	5	Soil Carbonate D47	Campanian	Late	75.16	NULL	75	49.2101	-84.2455	39.48	-111.49	34.5	35.7205	4.9	8	std. error	13.8593	Summer	3	North Horn Formation
	NA_KT_ped_59	Snell et al., 2014	Paleosols/Paleosol Carbonates	5	Soil Carbonate D47	Campanian	Late	74.97	NULL	75	49.2101	-84.2455	39.48	-111.49	34.2	35.4205	5.9	8	std. error	16.6877	Summer	3	North Horn Formation
	NA_KT_ped_60	Snell et al., 2014	Paleosols/Paleosol Carbonates	5	Soil Carbonate D47	Campanian	Late	74.02	NULL	75	49.2101	-84.2455	39.48	-111.49	42.1	43.4437	3.2	8	std. error	9.05097	Summer	3	North Horn Formation
	NA_KT_ped_61	Snell et al., 2014	Paleosols/Paleosol Carbonates	5	Soil Carbonate D47	Campanian	Late	73.68	NULL	75	49.2101	-84.2455	39.48	-111.49	36.9	38.2437	1.8	8	std. error	5.09117	Summer	3	North Horn Formation
	NA_KT_ped_62	Snell et al., 2014	Paleosols/Paleosol Carbonates	5	Soil Carbonate D47	Campanian	Late	72.79	NULL	75	49.2101	-84.2455	39.48	-111.49	38.1	39.4515	5.2	8	std. error	14.7078	Summer	3	North Horn Formation
	NA_KT_ped_63	Snell et al., 2014	Paleosols/Paleosol Carbonates	5	Soil Carbonate D47	Campanian	Late	72.65	NULL	75	49.2101	-84.2455	39.48	-111.49	31.5	32.8515	5.1	8	std. error	14.425	Summer	3	North Horn Formation
	NA_KT_ped_64	Snell et al., 2014	Paleosols/Paleosol Carbonates	5	Soil Carbonate D47	Campanian	Late	72.36	NULL	70	49.2101	-84.2455	39.48	-111.49	36.7	37.9439	5.1	8	std. error	14.425	Summer	3	North Horn Formation
	NA_KT_ped_66	Snell et al., 2014	Paleosols/Paleosol Carbonates	5	Soil Carbonate D47	Campanian	Middle	76.71	0.69	75	54.0001	-72.6708	46	-105	29	29.6276	6.75	8	std. error	19.0919	Summer	3	Age constraint from Folwer et al., 2017 Table S1; lat and lon Zhang et al., 2019; Snell et al. (2014) notes that this was a caliche
	NA_KT_otr_13	Snell et al., 2014	Other	4	Lacustrine Carbonate D47	Campanian	Middle, Late	76.71	0.69	75	54.0001	-72.6708	46	-105	30.33	30.9576	4.64	8	std. error	13.1239	Summer	3	Age constraint from Folwer et al., 2017 Table S1; lat and lon Zhang et al., 2019
	NA_KT_otr_14	Snell et al., 2014	Other	4	Lacustrine Carbonate D47	Campanian	Middle, Late	76.71	0.69	75	54.0001	-72.6708	46	-105	32.44	33.0676	8.92	8	std. error	25.2296	Summer	3	Age constraint from Folwer et al., 2017 Table S1; lat and lon Zhang et al., 2019
